# Supplementary material for: A new look at reflection seismic data from the Central Caledonian Transect across the Scandinavian Peninsula
Source: Copernicus journal article supplement (doi:10.5194/se-16-775-2025), 2025-08-08
Supplement: Supplementary file 1 [file se-16-775-2025-supplement.zip]

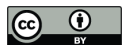

## *Supplement of*

# **A new look at reflection seismic data from the Central Caledonian Transect across the Scandinavian Peninsula**

**Christopher Juhlin et al.**

*Correspondence to:* Christopher Juhlin ([christopher.juhlin@geo.uu.se](mailto:christopher.juhlin@geo.uu.se))

- [se-16-775-2025-supplement-title-page.pdf](#)
- [Figure\\_5\\_ncct\\_scct\\_stack\\_LR.jpg](#)
- [Figure\\_6\\_ncct\\_scct\\_depth\\_LR.jpg](#)

The copyright of individual parts of the supplement might differ from the article licence.
